# Supplementary material
Source: Research Square preprint supplement (doi:10.21203/rs.3.rs-9042734/v1)
Supplement: Supplementary file 1 [file e093299c96ad5e730e09b91f.docx]

**Appendix A Delphistar Checklist**

| **Topic** | **Section** | **Item** | **Checklist Item** | **Location where item is reported** | **Answer** |
| --- | --- | --- | --- | --- | --- |
| **I**  **Title and Abstract** |  | 1 | Identification as a Delphi procedure in the title | pg. 1 | Title: Creating a competency framework for the delivery of IPE SIM: A Delphi study |
|  | 2 | Identification as a Delphi procedure in the abstract | pg. 1 | A Delphi procedure was selected to answer the research question. |
|  | 3 | Structured abstract | pg. 1,2 | e.g., background, method, results and discussion |
| **II**  **Context** | **Formal** | 4 | Information about the sources of funding | pg. 4 | This study was funded through the Erasmus+ Key Action 2 (KA220) Cooperation Partnerships scheme. |
| 5 | Information about the team of authors and/or researchers (e.g., discipline, institution) | pg. 1,15 | A full list of authors and their institutions is provided on the title page. We also name and provide the member institutions of all consortium members in the acknowledgements. |
| 6 | Information about method consulting | pg. 4 | No outside consulting in regard to method took place. |
| 7 | Information about the project background | pg. 3,4 | This study was conducted by an interdisciplinary team of European researchers from four European medical universities (Royal College of Surgeons in Ireland (RCSI), Humanitas University, Medical University of Vienna and Wrocław Medical University) as part of the Simulation Programme for Interprofessional Readiness and Immersive Training (SPIRIT) and aimed to define the core competencies required for IPE SIM educator training by gathering consensus from international experts in interprofessional simulation. |
| 8 | Information about the study protocol | pg. 4 | The approved study protocol has been available as part of the supplementary materials provided. |
|  | **Content** | 9 | Justification of the chosen method (Delphi procedure) to answer the research question | pg. 6 | The Delphi method was for answering the research question because it systematically gathers the judgments of different expert groups and can identity agreement and disagreement, as well as capturing unique perspectives from key members in a variety of institutions of practice. |
| 10 | Aim of the Delphi procedure (e.g., consensus, forecasting) | pg. 6 | A Delphi methodology, widely used in healthcare research (Khurana et al., 2022, Humphrey-Murto et al., 2017, Passarelli et al., 2024, Ye et al, 2022), was employed to gather expert consensus on IPE SIM core competencies and develop the competency framework. |
| **III**  **Method** | **Body & Integration of knowledge** | 11 | Identification and elucidation of relevant expertise, spheres of experience, and perspectives (e.g., theory, practice, affected groups, disciplines) | pg. 5 | Invitations were extended to SMEs from both academic and clinical backgrounds, representing a variety of healthcare professions and countries of practice. |
| 12 | Handling of knowledge, expertise and perspectives which are missing or have been deliberately not integrated | pg. 5 | Non-English-speaking experts were not recruited, this is openly communicated to the other respondents during the Delphi process. |
| 13 | Basic definition of expert1 | pg. 5 | For inclusion, SMEs must have considerable expertise in IPE SIM as evidenced by professional experience and/or publications in this area. |
| **Delphi variations** | 14 | Identification of the type of Delphi procedure and potential modifications (e.g., classic Delphi, real-time Delphi, group Delphi) | pg. 6 | Modifications to the ‘classic’ Delphi approach consisted of the generation of initial items prior to Round 1 of consensus gathering. The study was conducted following Delphi method guidelines (De Villiers et al., 2005) and reported in accordance with DELPHISTAR guidelines (Niederberger et al., 2024). Quantitative analysis in this study followed a similar structure to Mossenson et al. (2024). |
| 15 | Justification of the Delphi variation and modifications, including during the Delphi process, if applicable | pg. 6 | This decision to generate initial items prior to Round 1 is a common modification to the classic Delphi process chosen to provide increased evidence-based structure to the initial round of consensus gathering (Trevelyan & Robinson, 2015). |
| **Sample of experts** | 16 | Selection criteria for the experts (per round if there are different expert groups) | pg. 7 | All of the experts who met inclusion criteria were invited to the first round.  All of the experts who completed the previous round were invited to participate in the subsequent round. |
| 17 | Identification of the experts | pg. 5 | A combination of purposive and snowball sampling was used to recruit subject matter experts (SMEs) as research participants. This involved inviting known experts in the field as well as each member institution in the SPIRIT consortium suggesting experts from their professional networks. |
| 18 | Information about recruiting and any subsequent recruiting of experts | pg. 5,6 | Each participant received an invitation email describing the SPIRIT consortium, detailing study background and aims and outlining the proposed methodology. A participant information leaflet providing additional information related to this study was also provided to all participants via this email. Informed consent was gathered through a consent form hosted online using Survey Monkey software (https://www.surveymonkey.com/). |
| **Survey** | 19 | Elucidation of the content development for the questionnaire2 | pg. 4,5 | The literature on faculty development for IPE and SIM was then searched to identify potential competencies.3, 16, 17, 18, 19 Literature sources were varied and included the Core Competencies for Interprofessional Collaborative Practice20 and Standards of Best Practice for Simulation-Enhanced Interprofessional Education.21 Van Diggele et al9 and Anderson et al10 offered practical insights into the design, delivery and educator preparation for IPE and the CAIPE Interprofessional Education Handbook12 and Freeth et al11 detailed both useful theoretical frameworks and evaluation strategies. A literature-based infographic from Monash University summarising IPE facilitation strategies22, the CHSE Examination Blueprint23 and the DASH Debriefing Assessment24 further informed the initial list of competencies. This competency list was then further expanded by two expert researchers, one specializing in SBE (CC) and the other in IPE (FK). |
| 20 | Description of the questionnaire (content and structure) | pg. 5,6 | The competencies were systematically categorized according to the Academy of Medical Educators (AoME) domains of medical education. A decision was taken to include an additional domain, Debriefing and Reflective Practice, given its relevancy to the facilitation of IPE SIM.  Participants were presented with an initial draft of the IPE SIM competency framework with 42 items split into 6 domains and asked to rate each item's relevancy to the delivery of IPE SIM on a 4-point Likert scale (1 – not relevant, 2 – somewhat relevant, 3 – quite relevant, 4 – very relevant). Participants were provided with open-text boxes to comment on existing items, identify duplication, suggest improvements to language clarity, and propose any missing items. |
| **Delphi rounds** | 21 | Number of Delphi rounds | pg. 8 | Two Delphi rounds were held before stopping criteria was achieved. |
| 22 | Information about the aims of the individual Delphi rounds | pg. 6 | All Delphi rounds followed the same structure, gathering quantitative and qualitative consensus on competency items. |
| 23 | Disclosure and justification of the criterion for discontinuation | pg. 7,8 | The stopping criteria, or conditions under which this Delphi process would conclude, was quantitative consensus on all items, with no new items emerging from qualitative analysis. The number of rounds was predefined, with a maximum of three |
| **Feedback** | 24 | Information about what data was reported back per round | pg. 7 | After each round, SMEs were presented with a summary of open-text themes, iterations and frequencies of consensus. |
| 25 | Information on how the results of the previous Delphi round were fed back to the experts surveyed (e.g., via frequencies, mean values, measures of dispersion, listing of comments) | pg. 7 | SMEs were provided a summary with a description of the percentage of items which reached quantitative consensus, a description of themes constructed based on qualitative feedback and the number of iterations, additions and removed items. |
| 26 | Information on whether feedback was differentiated by specific groups (e.g., by field of expertise, institutional affiliation) | pg. 7 | The feedback was not differentiated by group. |
| 27 | Information about how dissent and unclear results were handled | pg. 7 | Dissenting or conflicting feedback was resolved through discussion resulting in the iteration, removal and addition of items. |
| **Data analysis** | 28 | Disclosure of the quantitative and qualitative analytical strategy | pg. 7 | A competency was defined as relevant if its median score was greater than or equal to three with >80% agreement and irrelevant if the median score was less than or equal to two with >80% agreement.    Open-text responses were thematically analysed by two authors (AF and FK). These analyses were reviewed to determine what, if any, iterations were required before the competencies were presented in the subsequent round. |
| 29 | Definition and measurement of consensus | pg. 7 | A competency was defined as relevant if its median score was greater than or equal to three with >80% agreement and irrelevant if the median score was less than or equal to two with >80% agreement. |
| 30 | Information on group-specific analysis or weighting of experts (e.g., theory vs. practice, discipline-specific analysis) | pg. 7 | The feedback was not differentiated by group. |
| **IV**  **Results** | **Delphi process** | 31 | Illustration of the Delphi process (e.g., in a flow chart) | pg. 11 | A summary of the process is illustrated in a flow chart (Figure 1). |
| 32 | Information about special aspects during the Delphi process (e.g., deviations from the intended approach with justification) | pg. 8 | There were no deviations from this intended approach. |
| 33 | Number of experts per round (both invited and participating) | pg. 8,9 | 97 participants were invited to participate in the study. Of these, 44 completed responses were recorded in Round 1, with 11 undelivered invitations and 10 out-of-office messages received (57.9% response rate).  Each of the 44 participants who responded to Round 1 of the survey received an invitation to Round 2. Of these, 33 completed responses were recorded in Round 1, and 3 out-of-office messages were received (81.2% response rate). |
| **Results** | 34 | Presentation of the results for each Delphi round and the final results | pg. 8-10 | 42/42 items included in our Round 1 competency framework reached positive relevant quantitative consensus.  43/43 items included in our Round 2 competency framework reached positive relevant quantitative consensus. |
| **V Discussion** | **Quality of findings** | 35 | Highlighting the findings from the Delphi study | pg. 14 | This study addressed the need for a competency framework to assist faculty preparation for IPE SIM. This framework provides a synthesis of research findings and expert opinions which provides guidelines of best practice for the design, implementation and facilitation of IPE SIM. |
| 36 | Validity of the results (e.g., transferability of the findings) | pg. 15 | It is difficult to assess the generalisability of these findings, a common limitation with Delphi methods.47 The international panel of experts in IPE SIM helps with mitigating this issue, although a greater geographical spread would have further improved the generalisability of the framework produced here. |
| 37 | Reliability of the results (e.g., split half, inter-rater reliability) | pg. 7 | Open-text responses were thematically analysed by two authors (AF and FK). |
| 38 | Reflection on potential limitations (e.g., distortion, skewing, bias) | pg. 15 | It is difficult to assess the generalisability of these findings, a common limitation with Delphi methods.47 The international panel of experts in IPE SIM helps with mitigating this issue, although a greater geographical spread would have further improved the generalisability of the framework produced here. Our total attrition rate of 25% between round 1 and round 2 introduces some risk of bias48, however, this is a common challenge with online Delphi methods.49 |

Figure 2. DELPHISTAR checklist

**Appendix B Table 4**

**Table 4:** Items added, edited and removed and quantitative consensus

| Domain | Round 1 item | Round 1 decision | Round 2 item | Round 2 decision | Round 1 % agreement | Round 2% agreement |
| --- | --- | --- | --- | --- | --- | --- |
| Curriculum and Scenario Design | Describe theories of interprofessional learning and their application to simulation. | Retained Unedited | - | Edited | 84.1% | 87.5% |
|  | Describe the attributes of interprofessional simulation co-design | Removed (Duplication) | N/A | N/A | 81.8% | N/A |
|  | Develop interprofessional learning outcomes aligned to an interprofessional competency framework. | Retained Unedited | - | Retained Unedited | 93.2% | 96.9% |
|  | Recognise the roles of each profession and interdependence for simulation design. | Retained Unedited | - | Edited | 100% | 100% |
|  | Design interprofessional simulation activities to align with curricular goals and learner levels. | Retained Unedited | - | Retained Unedited | 100% | 100% |
|  | Co-create simulation scenarios that reflect authentic, collaborative clinical practice. | Edited | Co-design simulation scenarios that reflect authentic, collaborative clinical practice. | Retained Unedited | 100% | 96.9% |
|  | Evaluate the effectiveness of designed scenarios using learner feedback and assessment outcomes. | Edited | Evaluate the effectiveness of designed scenarios using feedback and assessment outcomes. | Retained Unedited | 100% | 100% |
|  | Consider interprofessional group dynamics in the design of curricula. | Retained Unedited | - | Retained Unedited | 95.5% | 90.6% |
| Facilitating Learning | Describe the purpose and structure of interprofessional simulation. | Retained Unedited | - | Retained Unedited | 93.2% | 90.6% |
|  | Explain the key components of a structured pre-brief that fosters interprofessional collaboration and psychological safety. | Edited | Structure pre-brief that motivates learners to foster interprofessional collaboration and psychological safety. | Retained Unedited | 95.5% | 96.9% |
|  | Uses range of educational methods and technologies to achieve intended outcomes. | Retained Unedited | - | Edited | 95.5% | 96.9% |
|  | Demonstrate how to co-facilitate interprofessional simulation sessions that promote equitable participation. | Retained Unedited | - | Retained Unedited | 97.8% | 93.8% |
|  | Define psychological safety and its relevance in interprofessional simulation. | Retained Unedited | - | Removed (Duplication) | 100% | 93.8% |
|  | Recognize ethical issues and power dynamics that may emerge in interprofessional simulation. | Edited | Apply strategies to manage ethical issues and power dynamics during interprofessional simulation. | Retained Unedited | 97.8% | 93.8% |
|  | Apply strategies to foster an inclusive and respectful learning environment. | Edited | Foster an inclusive and respectful learning environment. | Edited | 97.8% | 100% |
|  | Evaluate facilitation strategies that support effective interprofessional teamwork and learning. | Retained Unedited | - | Retained Unedited | 100% | 93.8% |
|  | Evaluate scenarios for potential bias, cultural insensitivity, or inequity in learner experience. | Retained Unedited | - | Retained Unedited | 93.3% | 100% |
|  | Reflect on interprofessional simulation effectiveness | Edited | Reflect on and analyse the effectiveness of interprofessional simulation curricula. | Edited | 95.5% | 93.8% |
| Debriefing and Reflective Practice | Identify key models and frameworks for interprofessional simulation debriefing. | Edited | Use models and frameworks for interprofessional simulation debriefing. | Edited | 97.8% | 93.8% |
|  | Explain the principles of learner-centred and psychologically safe debriefing. | Edited | Foster learner-centred and psychologically safe debriefing. | Retained Unedited | 95.5% | 100% |
|  | Link theory to practice and evidence for collaborative practice | Edited | Shares evidence for benefits of collaborative practice | Removed | 90.9% | 81.3% |
|  | N/A | New item | Help learners link theory to interprofessional practice | Edited | N/A | 87.5% |
|  | Facilitate debriefing conversations that support interprofessional reflection and mutual learning. | Retained Unedited | - | Retained Unedited | 100% | 100% |
|  | Use questioning techniques to promote critical thinking and emotional processing by learners. | Retained Unedited | - | Retained Unedited | 95.5% | 96.9% |
|  | Analyse interprofessional interactions during simulation to guide meaningful debrief discussions. | Retained Unedited | - | Retained Unedited | 93.2% | 100% |
|  | Adapt debriefing strategies to the needs of diverse learners and complex group dynamics. | Retained Unedited | - | Retained Unedited | 100% | 100% |
|  | N/A | New item | Manage potential conflict and disagreement in a supportive and non-judgmental manner. | Edited | N/A | 100% |
| Learner Assessment | Relate assessment to the educational outcomes of a course or programme. | Removed (Duplication) | N/A | N/A | 97.8% | N/A |
|  | Demonstrate how the contribution of any assessment addresses the interprofessional learning outcomes. | Retained Unedited | - | Edited | 97.8% | 87.5% |
|  | Select assessment methods that match the purpose, content and level of the learner and evaluate interprofessional collaboration. | Edited | Select assessment methods that match the purpose, content and level of the learner and their interprofessional collaboration. | Edited | 93.2% | 93.8% |
|  | Document assessment data in a structured, objective, and constructive manner. | Edited | Conduct assessment in a structured, objective, and constructive manner. | Retained Unedited | 90.9% | 93.8% |
|  | Use assessment outcomes to guide feedback and support learner development. | Retained Unedited | - | Retained Unedited | 100% | 93.8% |
| Management and Leadership | Manage educational programmes and resources, including coordination of diverse professional and educational roles. | Retained Unedited | - | Edited | 86.4% | 93.8% |
|  | Develop and maintain an inclusive learning environment. | Retained Unedited | - | Retained Unedited | 100% | 100% |
|  | Draw upon a range of leadership theories for effective educational change. | Retained Unedited | - | Retained United | 84.1% | 87.5% |
|  | Support the educational development of others within a local team, educators faculty or department. | Edited | Support the educational development of others within a local team, educators or department. | Edited | 86.4% | 96.9% |
|  | Facilitates educational governance through quality control and quality improvement of education. | Edited | Facilitate educational governance through quality control and quality improvement of interprofessional simulation education. | Edited | 93.2% | 93.8% |
|  | Promote a culture of interprofessional collaboration, modelling inclusive leadership behaviours | Retained Unedited | - | Retained Unedited | 97.8% | 100% |
|  | N/A | New item | Facilitate processes that promote efficiency and reduce duplication across interprofessional simulation activities | Removed (Duplication) | N/A | 93.8% |
|  | Advocate for education, systems and practices that support integration across professions | Retained Unedited | - | Retained Unedited | 100% | 96.9% |
| Research and Scholarship | Integrate interprofessional simulation educational research into education and practice. | Edited | Integrate interprofessional simulation research into practice. | Retained Unedited | 88.6% | 93.8% |
|  | Engage in collaborative scholarship with interprofessional colleagues advancing understanding of simulation-based interprofessional education. | Edited | Engage in collaborative scholarship with interprofessional colleagues advancing simulation-based interprofessional education. | Edited | 95.5% | 96.9% |
|  | Employ appropriate research methodologies relevant to interprofessional simulation-based education research. | Retained Unedited | - | Retained Unedited | 84.1% | 90.6% |
|  | Disseminate findings through peer-reviewed publications, conference presentations, and internal knowledge-sharing platforms. | Retained Unedited | - | Edited | 88.6% | 93.8% |
|  | Advocate for inclusive, ethical and patient-centered perspectives in IPE simulation research~~.~~ | Edited | Advocate for inclusive, ethical, learner and patient-centered perspectives in IPE simulation research~~.~~ | Edited | 88.6% | 93.8% |

- item unchanged from previous round
